# Supplementary material
Source: publisher figshare collection journal article supplement (https://acs.figshare.com/ndownloader/files/5055469)
Supplement: Supplementary file 1 [file 5055469]

**Supporting Information for the Paper Entitled “Terminal  
Titanium(IV) Trimethylsilylimides Prepared by  
Oxidatively-Induced Trimethylsilyl Abstraction ”**

Brad C. Bailey, Falguni Basuli, John C. Huffman, and Daniel J. Mindiola\*

*Department of Chemistry and Molecular Structure Center, Indiana University,  
Bloomington, Indiana 47405 (USA)*

## Experimental Section

**General Considerations.** Unless otherwise stated, all operations were performed in a M. Braun Lab Master double-dry box under an atmosphere of purified nitrogen or using high vacuum standard Schlenk techniques under an argon atmosphere.<sup>1</sup> Anhydrous *n*-Hexane, pentane, toluene, and benzene were purchased from Aldrich in sure-sealed reservoirs (18 L) and dried by passage through two columns of activated alumina and a Q-5 column.<sup>2</sup> Diethylether was dried by passage through a column of activated alumina.<sup>2</sup> THF was distilled, under nitrogen, from purple sodium benzophenone ketyl and stored under sodium metal. Distilled THF was transferred under vacuum into bombs before being pumped into a dry box. C<sub>6</sub>D<sub>6</sub> and C<sub>7</sub>D<sub>8</sub> were purchased from Cambridge Isotope Laboratory (CIL), degassed and vacuum transferred to 4 Å molecular sieves. THF-*d*8 was purchased from CIL and used as received. Celite, alumina, and 4 Å molecular sieves were activated under vacuum overnight at 200 °C. Li([ArNC(Me)]<sub>2</sub>CH)<sup>3</sup> (Ar = 2,6-<sup>i</sup>Pr<sub>2</sub>C<sub>6</sub>H<sub>3</sub>), ([ArNC(Me)]<sub>2</sub>CH)TiCl<sub>2</sub>(THF)<sup>4</sup> and Li(PNP) (PNP = N[2-P(CHMe<sub>2</sub>)<sub>2</sub>-4-methylphenyl]<sub>2</sub>)<sup>5</sup> were prepared according to the literature. Ferrocenium trifluoromethanesulfonate was prepared by adding silver trifluoromethanesulfonate to a solution of ferrocene in CH<sub>2</sub>Cl<sub>2</sub>, then recrystallizing from a THF/CH<sub>2</sub>Cl<sub>2</sub> mixture at -35 °C. All other chemical were used as received. CHN analyses were performed by Desert Analytics, Tucson, AZ. <sup>1</sup>H, <sup>13</sup>C, <sup>19</sup>F, and <sup>31</sup>P NMR spectra were recorded on Varian 400 or 300 MHz NMR spectrometers. <sup>1</sup>H and <sup>13</sup>C NMR are reported with reference to solvent resonances (residual C<sub>6</sub>D<sub>5</sub>H in C<sub>6</sub>D<sub>6</sub>, 7.16 ppm and 128.0 ppm). <sup>19</sup>F NMR chemical shifts are reported with respect to external HOCOCF<sub>3</sub> (-78.5 ppm). <sup>31</sup>P NMR chemical shifts are reported with respect to external H<sub>3</sub>PO<sub>4</sub> (aqueous solution, δ 0.0 ppm).

Solution magnetization measurements were determined by the method of Evans.<sup>6,7</sup> X-ray diffraction data were collected on a SMART6000 (Bruker) system under a stream of N<sub>2</sub> (g) at low temperatures.<sup>8,9</sup>

### **Preparation of ([ArNC(Me)]<sub>2</sub>CH)TiCl(N{SiMe<sub>3</sub>})<sub>2</sub> (1)**

In a round bottom flask was dissolved ([ArNC(Me)]<sub>2</sub>CH)TiCl<sub>2</sub>(THF) [550 mg, 0.90 mmol] in toluene (50 mL) and the solution was cooled to –35 °C. To the solution was added dropwise a cold (–35 °C) toluene (20 mL) solution of sodium bis(trimethylsilyl)amide [165.7 mg, 0.90 mmol]. After stirring for 3 hours the solution was dried in vacuo. The residue was dissolved in ether and filtered. The filtrate was reduced in volume and cooled to –35 °C to afford **1** as dark red blocks [508 mg, 0.77 mmol, 85% yield].

For **1**: <sup>1</sup>H NMR (C<sub>6</sub>D<sub>6</sub>, 300.1 MHz, 25 °C): δ 8.77 (Δv<sub>1/2</sub> = 46 Hz), 6.55 (Δv<sub>1/2</sub> = 34 Hz), 4.86 (Δv<sub>1/2</sub> = 40 Hz), 4.13 (Δv<sub>1/2</sub> = 87 Hz), 2.95 (Δv<sub>1/2</sub> = 44 Hz), 2.11 (Δv<sub>1/2</sub> = 152 Hz), 0.88 (Δv<sub>1/2</sub> = 593 Hz). Evans Magnetic Moment (C<sub>6</sub>D<sub>6</sub>, 298K): μ<sub>eff</sub> = 1.93μ<sub>B</sub>. Anal. Calcd. for C<sub>35</sub>H<sub>59</sub>N<sub>3</sub>Si<sub>2</sub>ClTi : C, 63.56; H, 8.99; N, 6.35. Found: C, 63.26; H, 8.68; N, 6.32.

### **Preparation of (PNP)TiCl(N{SiMe<sub>3</sub>})<sub>2</sub> (2)**

In a 125 mL Erlenmeyer flask was added TiCl<sub>3</sub>(THF)<sub>3</sub> [485 mg, 1.309 mmol] to toluene (20 mL) and the solution was cooled to –35 °C. To the green-blue solution was added a cold (–35 °C) yellow toluene (20 mL) solution of Li(PNP) [560 mg, 1.286 mmol]. The solution changed from blue-green to red then finally to a purple color. The solution was

stirred for 1 hour and then cooled to  $-35\text{ }^{\circ}\text{C}$ . Upon cooling, sodium bis(trimethylsilyl)amide [252 mg, 1.374 mmol] diluted in toluene (10 mL) was added dropwise. The solution changed from purple to brown-red and was stirred for 2 hours. The solution was then dried in vacuo and redissolved in pentane. The solution was filtered through a bed of celite and the resulting yellow-brown solution was reduced in volume under vacuo, and cooled to  $-35\text{ }^{\circ}\text{C}$  to yield **2** as green blocks [560 mg, 0.833 mmol, 64% yield].

For **2**:  $^1\text{H}$  NMR ( $23\text{ }^{\circ}\text{C}$ , 399.8 MHz,  $\text{C}_6\text{D}_6$ ):  $\delta$  7.59 ( $\nu_{1/2} = 17\text{ Hz}$ ), 7.05 ( $\nu_{1/2} = 12\text{ Hz}$ ), 7.04 ( $\nu_{1/2} = 12\text{ Hz}$ ), 7.00 ( $\nu_{1/2} = 17\text{ Hz}$ ), 6.97 ( $\nu_{1/2} = 35\text{ Hz}$ ), 5.95 ( $\nu_{1/2} = 179\text{ Hz}$ ), 3.37 ( $\nu_{1/2} = 14\text{ Hz}$ ), 2.31 ( $\nu_{1/2} = 5\text{ Hz}$ ), 2.03 ( $\nu_{1/2} = 43\text{ Hz}$ ), 1.10 ( $\nu_{1/2} = 37\text{ Hz}$ ), 0.12 ( $\nu_{1/2} = 3\text{ Hz}$ ).  $\mu_{\text{eff}} = 1.64\text{ }\mu\text{B}$  ( $\text{C}_6\text{D}_6$ , 298 K, Evans' method). Anal. Calcd. for  $\text{C}_{32}\text{H}_{58}\text{N}_2\text{SiP}_2\text{TiCl}$ : C, 57.17; H, 8.70; N, 4.17. Found: C, 56.88; H, 8.81; N, 4.11.

### Preparation of $([\text{ArNC}(\text{Me})]_2\text{CH})\text{Ti}=\text{NSiMe}_3(\text{OTf})$ (**3**)

Using  $[\text{FeCp}_2][\text{OTf}]$ : In a vial was dissolved **1** [127 mg, 0.19 mmol] in THF (10 mL) and the solution was cooled to  $-35\text{ }^{\circ}\text{C}$ . To the cold dark solution was added solid  $[\text{FeCp}_2][\text{OTf}]$  [68 mg, 0.19 mmol]. The color of the solution rapidly changed to pale yellow ( $\sim 3\text{-}5\text{ min}$ ). The solution was then stirred for 1 hour and dried under vacuum. The residue was extracted with pentane and filtered. The filtrate was reduced in volume under reduced pressure, and then cooled to  $-35\text{ }^{\circ}\text{C}$ . After 5 min white crystals of **3** [72 mg, 0.10 mmol, 53% yield] were collected. Further cooling of the decanted liquid afforded a mixture of  $\text{FeCp}_2$  and compound **3**. Formation of  $\text{FeCp}_2$  and **3** is quantitative when the crude reaction is examined by  $^1\text{H}$  NMR spectroscopy.

Using **AgOTf**: In a vial was dissolved **1** [167 mg, 0.25 mmol] in toluene (10 mL) and the solution was cooled to  $-35\text{ }^{\circ}\text{C}$ . To the cold solution was added solid AgOTf [132.7 mg, 0.51 mmol], and the color of the solution changed to light yellow with copious amounts of precipitate. The solution was stirred for 2 hours, filtered and then dried in vacuo. The residue was extracted with Et<sub>2</sub>O and filtered. The filtrate was reduced in volume in vacuo, and cooled to  $-35\text{ }^{\circ}\text{C}$  to afford **3** as colorless crystals [143 mg, 0.20 mmol, 80% yield]. The crude <sup>1</sup>H NMR spectrum of the reaction mixture reveals the conversion of **1**→**3** to be quantitative. When the same above reaction was done in C<sub>6</sub>D<sub>6</sub> and analysis of volatiles indicated the presence of only Me<sub>3</sub>SiOTf.

For **3**: <sup>1</sup>H NMR (23  $^{\circ}\text{C}$ , 399.8 MHz, C<sub>6</sub>D<sub>6</sub>):  $\delta$  7.21-7.10 (m, 6H, Ar-*H*), 4.92 (s, 1H, ArN(Me)CCHC(Me)NAr), 3.14 (septet, 2H, CHMe<sub>2</sub>), 3.95 (septet, 2H, CHMe<sub>2</sub>), 1.74 (d, 6H, CHMe<sub>2</sub>), 1.53 (s, 6H, ArN(*Me*)CCHC(*Me*)NAr), 1.39 (d, 6H, CHMe<sub>2</sub>), 1.33 (d, 6H, CHMe<sub>2</sub>), 0.95 (d, 6H, CHMe<sub>2</sub>),  $-0.42$  (s, 9H, Ti=N-SiMe<sub>3</sub>). <sup>13</sup>C NMR (23 $^{\circ}\text{C}$ , 100.6 MHz, C<sub>6</sub>D<sub>6</sub>):  $\delta$  168.4 (ArN(Me)CCHC(Me)NAr), 144.8 (C<sub>6</sub>H<sub>3</sub>), 142.6 (C<sub>6</sub>H<sub>3</sub>), 140.2 (C<sub>6</sub>H<sub>3</sub>), 124.6 (C<sub>6</sub>H<sub>3</sub>), 124.1 (C<sub>6</sub>H<sub>3</sub>), 94.12 (ArN(Me)CCHC(Me)NAr), 29.91 (CHMe<sub>2</sub>), 28.65 (CHMe<sub>2</sub>), 25.85 (ArN(*Me*)CCHC(*Me*)NAr), 24.48 (*Me*), 24.22 (*Me*), 24.19 (*Me*), 23.52 (*Me*), 0.91 (Ti=N-SiMe<sub>3</sub>). <sup>19</sup>F NMR (23  $^{\circ}\text{C}$ , 282.3 MHz, C<sub>6</sub>D<sub>6</sub>):  $\delta$   $-77.97$  (s, Ti-O<sub>3</sub>SCF<sub>3</sub>). Anal. Calcd. for C<sub>33</sub>H<sub>50</sub>N<sub>3</sub>SiO<sub>3</sub>SF<sub>3</sub>Ti : C, 56.48; H, 7.18; N, 5.98. Found: C, 56.64; H, 7.15; N, 5.82.

#### Preparation of (PNP)Ti=NTMS(OTf) (**4**)

Using **AgOTf**: In a vial was dissolved **2** [374 mg, 0.556 mmol] in toluene (7 mL) and the solution was cooled to  $-35\text{ }^{\circ}\text{C}$ . To the cold green solution was added solid AgOTf

[290 mg, 1.128 mmol]. The solution turned dark red with copious amounts of precipitate. The solution was stirred for 1 hour, dried in vacuo, and the residue was extracted with pentane and filtered. The dark red filtrate was reduced in volume in vacuo, and then cooled to  $-35\text{ }^{\circ}\text{C}$  to afford **4** as red blocks [302 mg, 0.424 mmol, 76% yield].

Using **[FeCp<sub>2</sub>][OTf]**: In a vial was dissolved **2** [78 mg, 0.116 mmol] in THF (5 mL) and the solution was cooled to  $-35\text{ }^{\circ}\text{C}$ . To the cold green solution was added solid **[FeCp<sub>2</sub>][OTf]** [39 mg, 0.116 mmol]. The solution rapidly turned dark red, and was allowed to stir for 1 hour, and then dried in vacuo. The residue was extracted with Et<sub>2</sub>O filtered. The dark red filtrate was reduced in volume under vacuo, and then cooled to  $-35\text{ }^{\circ}\text{C}$ . The solution was carefully decanted from yellow crystals of ferrocene, and reduced again in volume under vacuo to afford **4** as red blocks [58 mg, 0.081 mmol, 70% yield].

For **4**: <sup>1</sup>H NMR (23  $^{\circ}\text{C}$ , 399.8 MHz, C<sub>6</sub>D<sub>6</sub>):  $\delta$  7.21 (dd, 1H, C<sub>6</sub>H<sub>3</sub>), 6.91 (d, 1H, C<sub>6</sub>H<sub>3</sub>), 6.85 (d, 1H, C<sub>6</sub>H<sub>3</sub>), 6.78 (m, 2H, C<sub>6</sub>H<sub>3</sub>), 6.72 (d, 1H, C<sub>6</sub>H<sub>3</sub>), 2.42 (sept, 1H, CHMe<sub>2</sub>), 2.15-2.31 (m, 2H, CHMe<sub>2</sub>), 2.12 (s, 3H, C<sub>6</sub>H<sub>3</sub>-Me), 2.06 (s, 3H, C<sub>6</sub>H<sub>3</sub>-Me), 1.95-2.09 (m, 1H, CHMe<sub>2</sub>), 1.31-1.59 (m, 12H, CHMe<sub>2</sub>), 1.05 (dd, 3H, CHMe<sub>2</sub>), 0.95 (dd, 3H, CHMe<sub>2</sub>), 0.72-0.80 (m, 6H, CHMe<sub>2</sub>), 0.03 (s, 9H, Ti=N-SiMe<sub>3</sub>). <sup>13</sup>C NMR (23  $^{\circ}\text{C}$ , 100.6 MHz, C<sub>6</sub>D<sub>6</sub>):  $\delta$  160.6 (d, C<sub>6</sub>H<sub>3</sub>), 157.4 (dd, C<sub>6</sub>H<sub>3</sub>), 133.5 (C<sub>6</sub>H<sub>3</sub>), 133.1 (C<sub>6</sub>H<sub>3</sub>), 132.9 (C<sub>6</sub>H<sub>3</sub>), 131.9 (d, C<sub>6</sub>H<sub>3</sub>), 131.7 (C<sub>6</sub>H<sub>3</sub>), 122.8 (C<sub>6</sub>H<sub>3</sub>), 120.6 (d, C<sub>6</sub>H<sub>3</sub>), 120.3 (d, C<sub>6</sub>H<sub>3</sub>), 116.1 (d, C<sub>6</sub>H<sub>3</sub>), 115.6 (d, C<sub>6</sub>H<sub>3</sub>), 24.5 (d, CHMe<sub>2</sub>), 23.7 (d, CHMe<sub>2</sub>), 20.9 (C<sub>6</sub>H<sub>3</sub>-Me), 20.4 (C<sub>6</sub>H<sub>3</sub>-Me), 20.4 (d, CHMe<sub>2</sub>), 20.3 (d, CHMe<sub>2</sub>), 20.0 (d, CHMe<sub>2</sub>), 19.8 (d, CHMe<sub>2</sub>), 19.5 (d, CHMe<sub>2</sub>), 18.4 (d, CHMe<sub>2</sub>), 17.5 (d, CHMe<sub>2</sub>), 17.4 (d, CHMe<sub>2</sub>), 17.0 (d, CHMe<sub>2</sub>), 15.9 (d, CHMe<sub>2</sub>), 2.7 (Ti=N-SiMe<sub>3</sub>). <sup>31</sup>P NMR (23  $^{\circ}\text{C}$ , 121.5 MHz, C<sub>6</sub>D<sub>6</sub>):  $\delta$  28.4 (d,  $J_{\text{P-P}} = 60$  Hz), 20.3 (d,  $J_{\text{P-P}} = 60$  Hz). <sup>19</sup>F NMR (23  $^{\circ}\text{C}$ , 282.3 MHz, C<sub>6</sub>D<sub>6</sub>):  $\delta$  -76.9 (Ti-OSO<sub>2</sub>CF<sub>3</sub>).

Anal. Calcd. for  $C_{30}H_{49}N_2SiP_2TiO_3SF_3$ : C, 50.56; H, 6.93; N, 3.93. Found: C, 50.31; H, 7.11; N, 3.79.

#### Preparation of $([ArNC(Me)]_2CH)Ti=NSiMe_3(Cl)$ (**5**)

In a vial was dissolved **3** [362 mg, 0.51 mmol] in THF (10 mL) and to the room temperature solution was added excess solid  $MgCl_2$  [147.3 mg, 1.54 mmol]. The solution was stirred for 3 hours, and dried in vacuo. The solid was extracted with pentane, filtered through a bed of celite, and the filtrate reduced in volume under vacuo to afford colorless crystals of **5** [258 mg, 0.44 mmol, 86% yield] (the crude NMR shows the conversion of **3**→**5** to be quantitative).

For **5**:  $^1H$  NMR (23 °C, 399.8 MHz,  $C_6D_6$ ):  $\delta$  7.21-7.10 (m, 6H, Ar-*H*), 4.86 (s, 1H, ArN(Me)CCHC(Me)NAr), 3.48 (septet, 2H, CHMe<sub>2</sub>), 3.31 (septet, 2H, CHMe<sub>2</sub>), 1.70 (d, 6H, CHMe<sub>2</sub>), 1.50 (s, 6H, ArN(Me)CCHC(Me)NAr), 1.42 (d, 6H, CHMe<sub>2</sub>), 1.22 (d, 6H, CHMe<sub>2</sub>), 1.03 (d, 6H, CHMe<sub>2</sub>), -0.27 (s, 9H, Ti=N-SiMe<sub>3</sub>).  $^{13}C$  NMR (23°C, 100.6 MHz,  $C_6D_6$ ):  $\delta$  168.5 (ArN(Me)CCHC(Me)NAr), 144.7 ( $C_6H_3$ ), 142.7 ( $C_6H_3$ ), 140.9 ( $C_6H_3$ ), 127.4 ( $C_6H_3$ ), 124.5 ( $C_6H_3$ ), 124.1 ( $C_6H_3$ ), 95.69 (ArN(Me)CCHC(Me)NAr), 29.06 (CHMe<sub>2</sub>), 28.69 (CHMe<sub>2</sub>), 26.99 (ArN(Me)CCHC(Me)NAr), 24.46 (Me), 24.36 (Me), 23.98 (Me), 23.69 (Me), 1.35 (Ti=N-SiMe<sub>3</sub>). Anal. Calcd. for  $C_{32}H_{50}N_3SiClTi$ : C, 65.35; H, 8.56; N, 7.14. Found: C, 65.00; H, 8.30; N, 6.89.

#### Preparation of (PNP)Ti=NSiMe<sub>3</sub>(Cl) (**6**)

In a vial was dissolved **4** [66 mg, 0.093 mmol] in THF (6 mL) and to the room temperature solution was added excess solid  $MgCl_2$  [26 mg, 0.273 mmol]. The solution

was stirred for 3 hours, and then dried in vacuo. The dark red solution was extracted with pentane, filtered through a bed of celite, and then reduced in volume under vacuo to afford dark red crystals of **6** [46 mg, 0.077 mmol, 83% yield]. The crude  $^1\text{H}$  NMR of the reaction mixture shows the conversion of **4**→**6** to be quantitative.

For **6**:  $^1\text{H}$  NMR (23 °C, 399.8 MHz,  $\text{C}_6\text{D}_6$ ):  $\delta$  7.27 (dd, 1H,  $\text{C}_6\text{H}_3$ ), 6.93 (dd, 1H,  $\text{C}_6\text{H}_3$ ), 6.85-6.88 (m, 2H,  $\text{C}_6\text{H}_3$ ), 6.78-6.80 (m, 2H,  $\text{C}_6\text{H}_3$ ), 2.46 (sept, 1H,  $\text{CHMe}_2$ ), 2.16-2.29 (m, 2H,  $\text{CHMe}_2$ ), 2.13 (s, 3H,  $\text{C}_6\text{H}_3\text{-Me}$ ), 2.09 (s, 3H,  $\text{C}_6\text{H}_3\text{-Me}$ ), 1.94 (sept, 1H,  $\text{CHMe}_2$ ), 1.67 (dd, 3H,  $\text{CHMe}_2$ ), 1.46 (dd, 3H,  $\text{CHMe}_2$ ), 1.32-1.40 (m, 6H,  $\text{CHMe}_2$ ), 1.25 (dd, 3H,  $\text{CHMe}_2$ ), 0.94-1.02 (m, 6H,  $\text{CHMe}_2$ ), 0.85 (dd, 3H,  $\text{CHMe}_2$ ), 0.18 (s, 9H,  $\text{Ti=N-SiMe}_3$ ).  $^{13}\text{C}$  NMR (23 °C, 100.6 MHz,  $\text{C}_6\text{D}_6$ ):  $\delta$  161.3 (d,  $\text{C}_6\text{H}_3$ ), 159.3 (dd,  $\text{C}_6\text{H}_3$ ), 133.1 ( $\text{C}_6\text{H}_3$ ), 133.0 ( $\text{C}_6\text{H}_3$ ), 132.9 ( $\text{C}_6\text{H}_3$ ), 132.0 ( $\text{C}_6\text{H}_3$ ), 130.0 (d,  $\text{C}_6\text{H}_3$ ), 126.6 (d,  $\text{C}_6\text{H}_3$ ), 120.5 (d,  $\text{C}_6\text{H}_3$ ), 120.2 (d,  $\text{C}_6\text{H}_3$ ), 116.5 (d,  $\text{C}_6\text{H}_3$ ), 115.9 (d,  $\text{C}_6\text{H}_3$ ), 24.7 (d,  $\text{CHMe}_2$ ), 23.9 (d,  $\text{CHMe}_2$ ), 20.9 ( $\text{C}_6\text{H}_3\text{-Me}$ ), 20.5 ( $\text{C}_6\text{H}_3\text{-Me}$ ), 20.4 (d,  $\text{CHMe}_2$ ), 20.0 (d,  $\text{CHMe}_2$ ), 19.9 (d,  $\text{CHMe}_2$ ), 19.8 (d,  $\text{CHMe}_2$ ), 19.6 (d,  $\text{CHMe}_2$ ), 18.9 (d,  $\text{CHMe}_2$ ), 18.2 (d,  $\text{CHMe}_2$ ), 17.7 (d,  $\text{CHMe}_2$ ), 17.0 (d,  $\text{CHMe}_2$ ), 15.7 (d,  $\text{CHMe}_2$ ), 3.2 ( $\text{Ti=N-SiMe}_3$ ).  $^{31}\text{P}$  NMR (23 °C, 121.5 MHz,  $\text{C}_6\text{D}_6$ ):  $\delta$  29.0 (d,  $J_{\text{P-P}} = 62$  Hz), 20.7 (d,  $J_{\text{P-P}} = 62$  Hz). Anal. Calcd. for  $\text{C}_{29}\text{H}_{49}\text{N}_2\text{SiP}_2\text{TiCl}$ : C, 58.14; H, 8.24; N, 4.67. Found: C, 57.86; H, 8.50; N, 4.30.

### Reaction of Complex **5** with 1 equiv of AgOTf to Prepare Complex **3**

In a vial was mixed **5** [35 mg, 0.06 mmol] and AgOTf [15.3 mg, 0.06 mmol]. To the solids was added  $\text{C}_6\text{D}_6$  (1 mL) and reaction was allowed to stir for 2 hours. The solution was filtered, and  $^1\text{H}$  and  $^{19}\text{F}$  NMR spectrum of the filtrate indicated the complete conversion of **5** to **3**.



### **Reaction of Complex 1 with 1 equiv of AgOTf**

In a vial was mixed **1** [55 mg, 0.08 mmol] and AgOTf [21.4 mg, 0.08 mmol]. To the solids was added C<sub>6</sub>D<sub>6</sub> (1 mL) and the mixture stirred for 1 hr. The solution was filtered and <sup>1</sup>H NMR spectrum of the filtrate indicated the formation of **5**, **3**, Me<sub>3</sub>SiOTf, and Me<sub>3</sub>SiCl (1:3:1:3 ratio, respectively). The <sup>19</sup>F NMR spectrum also suggested the presence of both **3** and Me<sub>3</sub>SiOTf.

### **Reaction of 3 with TMS-Cl**

In a vial was mixed complex **3** [35 mg, 0.05 mmol] and Me<sub>3</sub>SiCl [15.4 mg, 0.14 mmol]. To the mixture was added C<sub>6</sub>D<sub>6</sub> (1 mL) and the reaction allowed to stir for 3 hours. The <sup>1</sup>H and <sup>19</sup>F NMR spectrum of the mixture indicated the presence of both **5** and **3** (1:3 ratio).

### **Reaction of 2 with 1 equiv of AgOTf**

In a vial **2** [42 mg, 0.062 mmol] and AgOTf [16 mg, 0.062 mmol] were mixed. To the mixture was added C<sub>6</sub>D<sub>6</sub> (1 mL) and the reaction was allowed to stir for 1 hour. The mixture was filtered, and <sup>1</sup>H NMR spectrum of the crude filtrate indicated the formation of **6**, **4**, Me<sub>3</sub>SiOTf and Me<sub>3</sub>SiCl (1:3:1:3 ratio, respectively). The <sup>19</sup>F NMR spectrum also indicated the presence of both **4** and Me<sub>3</sub>SiOTf.

### **Reaction of TMS-Cl with AgOTf**

In a vial was mixed Me<sub>3</sub>SiCl [60 mg, 0.55 mmol] and AgOTf [143 mg, 0.56 mmol]. To the mixture was added C<sub>6</sub>D<sub>6</sub> (1 mL) to for a white precipitate. The reaction mixture was allowed to stir for 2 hours. The crude solution was filtered and <sup>1</sup>H and <sup>19</sup>F NMR spectrum of the filtrate indicated the complete conversion of Me<sub>3</sub>SiCl to Me<sub>3</sub>SiOTf.

For **TMS-OTf**: <sup>1</sup>H NMR (23 °C, 399.8 MHz, C<sub>6</sub>D<sub>6</sub>): δ –0.001 (s). <sup>19</sup>F NMR (23 °C, 282.3 MHz, C<sub>6</sub>D<sub>6</sub>): δ –77.87 (s).

## References

- (1) For a general description of the equipment and techniques used in carrying out this chemistry see: Burger, B. J.; Bercaw, J. E. In *Experimental Organometallic Chemistry*; Wayda, A. L.; Darensbourg, M. Y., Edx.; ACS Symposium Series 357; American Chemical Society; Washington D. C., 1987; pp 79-98.
- (2) Pangborn; A. B.; Giardello, M. A.; Grubbs, R. H.; Rosen, R. K.; Timmers, F. J. *Organometallics* **1996**, *15*, 1518.
- (3) Stender, M.; Wright, R. J.; Eichler, B. E.; Prust, J.; Olmstead, M. M.; Roesky, H. W.; Power, P. P. *J. Chem. Soc., Dalton Trans.* **2001**, 3465.
- (4) (a) Budzelaar, P. H. M.; van Oort, A. B.; Orpen, A. G. *Eur. J. Inorg. Chem.* **1998**, 1485. (b) Basuli, F.; Bailey, B. C.; Tomaszewski, J; Huffman, J. C.; Mindiola, D. J. *J. Am. Chem. Soc.* **2003**, *125*, 6052.
- (5) (a) Weng, W.; Yang, L.; Foxman, B. M.; Ozerov, O. V. *Organometallics* **2004**, *23*, 4700. (b) Ozerov, O. V.; Guo, C.; Papkov, V. A.; Foxman, B. M. *J. Am. Chem. Soc.* **2004**, *126*, 4792. (c) Fan, L.; Foxman, B. M.; Ozerov, O. V. *Organometallics* **2004**, *23*, 326.
- (6) Sur, S. K. *J. Mag. Reson.* **1989**, *82*, 169.

- (7) Evans, D. F. *J. Chem. Soc.* **1959**, 2003.
- (8) SAINT 6.1, Bruker Analytical X-Ray Systems, Madison, WI.
- (9) SHELXTL-Plus V5.10, Bruker Analytical X-Ray Systems, Madison, WI.
